# Supplementary material for: Effects of the Kampo medicine Yokukansan for perioperative anxiety and postoperative pain in women undergoing breast surgery: A randomized, controlled trial
Source: PLoS One. 2021 Nov 24;16(11):e0260524. doi: 10.1371/journal.pone.0260524 (PMC8612547; doi:10.1371/journal.pone.0260524)
Supplement: S1 Data — (XLSX) [file pone.0260524.s006.xlsx]

## Sheet: moegi_yokukansanstudy_analysis
ID	group	height	weight	BMI	age	amylase_1	amylase_2	amylase_3	HADS_A_1	HADS_A_2	HADS_D_1	HADS_D_2	STAI_S_1	STAI_S_2	STAI_T_1	STAI_T_2	QOR_1	QOR_2	vas
1	YKS	160	48.6	18.9	47	26	2	2	5	2	3	4	48	34	34	33	50	43	2
2	YKS	151	40.1	17.5	41	53	4	4	6	6	4	6	44	50	50	51	44	35	2
3	YKS	166	57.1	20.7	50	2	15	17	8	2	3	4	54	31	57	48	40	55	1
4	YKS	159	45.7	18.1	44	39	7	23	9	4	3	4	55	48	43	44	54	45	2
5	YKS	155.8	49	20.2	49	68	7	2	12	6	12	9	51	39	52	47	46	48	1
6	YKS	163	51	19.4	49	2	2	2	9	9	6	5	46	48	72	46	46	55	1
7	YKS	167	55.6	19.9	41	17	10	10	7	7	5	5	58	45	48	39	42	50	1
8	YKS	160	60	23	57	14	14	27	10	5	3	3	46	34	38	37	46	49	2
9	YKS	159	55.8	22.1	46	20	18	39	7	6	5	5	34	35	39	34	47	38	1
10	YKS	163	49.5	18.6	51	92	47	102	5	2	2	3	45	36	41	33	51	52	2
11	YKS	153	46	19.7	50	3	2	47	12	7	11	6	57	45	50	36	45	35	1
12	YKS	159	52	20.6	37	76	16	37	11	3	7	5	55	45	60	58	52	51	2
13	YKS	149	53	24	55	3	3	3	12	6	3	2	46	54	55	50	31	34	1
14	YKS	158.4	54.1	21.6	50	21	12	105	5	2	5	13	30	50	42	41	39	51	1
15	YKS	158	50	19.9	50	28	82	3	6	6	3	3	50	45	43	45	45	36	1
16	YKS	156.6	51.6	19.9	44	61	24	15	6	7	10	8	46	46	44	46	56	39	2
17	YKS	164	66	24.5	48	3	3	40	13	7	3	7	62	39	62	59	47	50	2
18	YKS	163	55.8	21	53	23	23	19	6	4	6	4	48	36	44	38	49	45	2
19	YKS	155.7	44.5	18.4	43	14	3	3	4	1	1	0	39	22	30	29	56	48	2
20	YKS	160	50	19.5	51	107	11	65	8	4	4	4	57	47	50	49	52	58	1
21	YKS	157.6	46	18.7	38	6	4	4	4	4	2	4	40	27	35	27	56	53	1
22	YKS	158	60	23.8	59	12	3	3	1	0	0	0	22	22	25	21	55	56	2
23	YKS	150	40	17.8	42	47	3	21	13	2	3	4	49	34	47	46	40	39	2
24	YKS	157.5	57.9	23.3	60	3	12	27	10	8	8	7	54	44	59	47	28	39	1
25	YKS	154.6	40.5	16.9	52	42	14	15	10	4	5	15	57	40	55	47	30	39	1
26	YKS	160.6	53.4	20.6	48	4	5	4	5	0	0	0	43	29	43	35	53	54	1
27	YKS	157	50	21.6	42	5	4	5	10	6	7	6	53	41	54	52	31	36	1
28	YKS	160	50	19.5	51	107	11	65	8	7	4	4	37	40	36	40	51	46	1
29	YKS	158.5	46	18.4	54	19	4	31	6	6	7	8	47	37	50	44	35	41	1
30	YKS	162	51	19.5	46	4	8	12	7	12	3	8	54	51	52	58	46	41	2
31	YKS	161	53	20.5	51	3	52	42	8	5	7	7	44	36	51	56	33	35	2
32	YKS	156	51.7	22.2	53	4	4	4	7	5	8	7	46	35	46	38	42	44	1
33	YKS	156	44	18.5	53	7	5	2	9	6	5	2	54	53	53	38	30	57	1
34	YKS	153.4	45.2	19.2	56	13	4	8	7	6	3	4	39	31	34	34	42	43	1
35	YKS	158.6	45.2	33	42	5	4	5	5	7	4	5	44	34	45	45	48	46	1
36	Control	154	54.8	22.9	56	9	34	42	4	4	4	2	48	43	41	40	40	45	2
37	Control	162	69.5	26.5	60	11	2	4	9	11	9	14	64	70	59	68	39	34	2
38	Control	154.1	45.5	19.1	35	13	12	4	6	7	7	7	48	44	49	46	40	46	1
39	Control	164	51	19.2	50	59	43	48	10	8	8	8	57	40	48	42	48	48	1
40	Control	160	47.5	18.5	50	71	70	108	18	8	15	15	53	46	38	56	34	41	2
41	Control	160	48.7	18.7	41	41	20	35	9	6	10	7	54	42	50	44	34	45	1
42	Control	158	51	20.4	60	71	73	30	18	10	15	10	72	43	64	57	37	43	2
43	Control	155.8	50	20.6	41	10	28	16	5	10	2	7	46	43	45	47	38	48	2
44	Control	151.9	47.2	20.5	44	9	11	31	12	13	12	14	69	53	71	68	36	38	2
45	Control	163	52	19.6	50	5	44	50	10	3	3	4	35	26	32	26	55	53	1
46	Control	160	58	22.8	50	52	30	28	5	5	4	4	48	45	58	41	47	33	1
47	Control	159	47	18.9	53	27	42	54	5	2	10	7	46	43	45	47	38	48	1
48	Control	158.9	64.4	25.5	53	55	55	89	10	10	8	10	57	40	47	41	45	45	1
49	Control	158	60	24.3	47	47	14	34	5	4	0	2	42	43	42	38	41	49	2
50	Control	158	51	20.4	57	7	9	10	6	4	8	9	57	46	46	41	33	40	1
51	Control	160	58.4	22.8	48	3	2	21	10	3	3	0	47	26	49	44	47	55	1
52	Control	154.9	52	21.7	55	19	16	3	8	3	5	2	37	33	36	34	42	38	2
53	Control	157.6	46	18.7	42	3	5	3	4	2	0	0	71	52	31	26	58	54	1
54	Control	163	54.2	20.2	55	3	22	4	6	4	6	10	45	40	55	56	43	43	1
55	Control	159	47	18.9	53	27	42	54	9	6	8	8	58	51	51	56	45	37	1
56	Control	151	42	18.9	43	27	45	42	8	8	2	2	52	27	53	57	53	50	1
57	Control	157.9	42	16.9	39	14	13	27	18	11	17	11	69	56	74	71	29	41	2
58	Control	152	77.4	33.5	51	98	93	93	6	9	14	11	62	53	55	54	47	49	1
59	Control	152	45	19.5	42	13	9	18	2	5	3	3	60	39	37	35	46	41	1
60	Control	154.6	44.5	18.6	39	23	3	5	7	7	3	3	58	29	40	36	44	49	2
61	Control	156.3	59.3	24.5	59	7	3	4	6	5	4	4	46	45	47	46	42	44	1
62	Control	160	51	19.9	57	4	9	3	6	5	2	2	51	30	35	36	47	50	1
63	Control	157	51.3	20.8	47	4	19	66	5	5	5	9	47	39	42	42	48	26	1
64	Control	153.9	55	23.3	51	4	5	4	6	3	4	3	51	34	41	43	40	51	1
65	Control	158.5	48.6	19.4	47	3	4	3	12	14	13	19	53	53	62	62	39	48	2
66	Control	156	50	20.5	46	17	46	3	4	4	2	5	32	37	36	37	46	40	1
67	Control	162	55	21	46	56	15	53	4	3	3	6	43	41	30	35	57	48	2
68	Control	157.5	67.6	27.3	45	4	4	6	7	15	11	12	53	65	49	50	44	45	1
69	Control	163	62	23.2	50	3	26	68	5	7	4	6	47	49	47	47	32	28	2
70	Control	154	53	22.4	55	4	4	6	7	7	5	10	37	29	40	40	44	51	1
71	Control	157.2	68	28.4	47	3	4	5	4	1	0	0	32	22	27	29	50	48	1
72	Control	156	65	26.7	56	3	3	54	4	3	1	1	60	45	33	67	49	40	1
73	Control	159.3	49.4	19.5	42	4	5	5	9	7	1	6	46	48	43	45	40	38	2
74	Control	166	58	21	48	4	52	15	0	0	2	3	32	30	27	35	55	47	2
75	Control	165	72	26.6	58	42	49	27	12	10	9	9	59	53	53	50	29	49	1
76	Control	158.8	52.6	20.9	47	3	5	8	9	2	7	7	45	46	52	52	35	50	1
77	Control	155	54.9	22.7	49	47	5	6	4	0	7	7	25	22	25	23	55	54	1

## Sheet: Sheet1
group	weight	BMI	age	ope_method	ASA	PS	establishment
1	48.6	18.9	47	2	2	0	0
1	40.1	17.5	41	1	2	0	0
1	57.1	20.7	50	2	2	0	0
1	45.7	18.1	44	1	1	0	0
1	49	20.2	49	2	2	0	0
1	51	19.4	49	2	1	0	0
1	55.6	19.9	41	2	1	0	0
1	60	23	57	2	2	0	0
1	55.8	22.1	46	1	1	0	0
1	49.5	18.6	51	2	1	0	0
1	46	19.7	50	2	1	0	0
1	52	20.6	37	2	1	0	0
1	53	24	55	1	2	0	0
1	54.1	21.6	50	1	2	0	1
1	50	19.9	50	1	2	0	0
1	51.6	19.9	44	1	2	0	1
1	66	24.5	48	1	2	0	1
1	55.8	21	53	1	1	0	0
1	44.5	18.4	43	1	2	0	0
1	50	19.5	51	2	2	0	1
1	46	18.7	38	1	1	0	1
1	60	23.8	59	2	2	0	1
1	40	17.8	42	1	1	0	1
1	57.9	23.3	60	2	2	0	1
1	40.5	16.9	52	2	2	0	1
1	53.4	20.6	48	1	1	0	1
1	50	21.6	42	2	1	0	1
1	50	19.5	51	2	2	0	1
1	46	18.4	54	1	2	0	1
1	51	19.5	46	1	2	0	0
1	53	20.5	51	2	2	0	1
1	51.7	22.2	53	1	1	0	1
1	44	18.5	53	1	1	0	1
1	45.2	19.2	56	1	2	0	1
1	45.2	33	42	1	2	0	1
2	54.8	22.9	56	1	1	0
2	69.5	26.5	60	1	2	0	0
2	45.5	19.1	35	2	2	0	0
2	51	19.2	50	2	1	0	0
2	47.5	18.5	50	2	1	0	0
2	48.7	18.7	41	2	1	0	0
2	51	20.4	60	1	1	0	0
2	50	20.6	41	1	1	0	0
2	47.2	20.5	44	2	2	0	0
2	52	19.6	50	2	2	0	0
2	58	22.8	50	1	2	0	0
2	47	18.9	53	1	1	0	0
2	64.4	25.5	53	2	3	0	0
2	60	24.3	47	2	2	0	0
2	51	20.4	57	2	2	0	0
2	58.4	22.8	48	2	1	0	0
2	52	21.7	55	1	2	0	0
2	46	18.7	42	2	1	0	0
2	54.2	20.2	55	1	1	0	1
2	47	18.9	53	1	1	0	1
2	42	18.9	43	2	1	0	0
2	42	16.9	39	1	1	0	0
2	77.4	33.5	51	2	2	0	1
2	45	19.5	42	2	1	0	0
2	44.5	18.6	39	2	2	0	0
2	59.3	24.5	59	1	2	0	1
2	51	19.9	57	1	1	0	1
2	51.3	20.8	47	2	1	0	1
2	55	23.3	51	1	1	0	1
2	48.6	19.4	47	1	2	0	1
2	50	20.5	46	2	1	0	1
2	55	21	46	1	2	0	1
2	67.6	27.3	45	1	2	0	1
2	62	23.2	50	1	1	0	1
2	53	22.4	55	2	2	0	1
2	68	28.4	47	1	1	0	1
2	65	26.7	56	1	2	0	1
2	49.4	19.5	42	2	1	0	1
2	58	21	48	2	2	0	1
2	72	26.6	58	2	2	0	1
2	52.6	20.9	47	1	2	0	1
2	54.9	22.7	49	1	1	0	1
							1
